# Supplementary material for: Efficient preparation of fluorescent nanomaterials derived from chitin via a modification-first strategy assisted by click chemistry
Source: Royal Society of Chemistry journal article supplement (doi:10.1039/d4gc01793e), 2024-01-01
Supplement: d4gc01793e1.pdf [file d4gc01793e1.pdf]

## Supplementary Information

### Efficient preparation of fluorescent nanomaterials derived from chitin via modification first strategy assisted by click chemistry

Yingyin Liu, Bowen Li, Chaoqun Xu, Zicong Shi, Liang Liu,  
Yimin Fan, Juan Yu\*

Jiangsu Co-Innovation Center of Efficient Processing and Utilization of Forest Resources,  
International Innovation Center for Forest Chemicals and Materials, College of Chemical  
Engineering, Nanjing Forestry University, Nanjing 210037, China.

E-mail: [yujuannjfu@njfu.edu.cn](mailto:yujuannjfu@njfu.edu.cn)

### Experimental Section

#### (1) Deacetylation of Chitin

$\alpha$ -Chitin (1 g) was suspended in 33% (w/w) NaOH (25 ml) and the slurry was heated at 90°C for 4 h with stirred. The partially deacetylated chitin was collected, and thoroughly washed with de-ionized water by repeated centrifugation at 8000 r/min for 5 min to neutrality. A portion of the wet NaOH-treated product was freeze-dried for further analyses, and the rest was kept in the wet state at 4°C.

#### (2) Preparation of TOChN-PPK and ChitinPPK

The preparation method of TOChN is as follows, the ratio of chitin to water was 1:100 (g/v) consisting of TEMPO (0.016 g/g chitin) and NaBr (0.10 g/g chitin), and then NaClO solution (8 mmol/g chitin) was mixed in the suspension in order to oxidize all the hydroxyl group at the C6 position. Moreover, the pH of the mixture was kept at 10 for 4 h at room temperature. Next, the sediments were cleaned to neutral with distilled water and homogenized under high pressure. The TOChN aqueous dispersion (the concentration was 1.01%, and the carboxyl content of TOChN was 0.93 mmol/g) was centrifuged (5 min, 8000 rpm) and stored at 4°C until use.

TOChN dispersion (0.10 g dry weight) was taken to adjust pH to 13, 0.081 g PPK (0.62 mmol) (dissolved in DMF) and DMAP (0.0075 g, 0.062 mmol) were added and stirred for 4 h. Finally, TOChN-PPK were obtained by multi centrifugal washing with

ethanol.

Chitin powder (0.10 g dry weight) was dispersed in water and the pH was adjusted pH to 13, 0.081 g PPK (0.62 mmol) (dissolved in DMF) and DMAP (0.0075 g, 0.062 mmol) were added and stirred for 4 h. Finally, ChitinPPK were obtained by multi centrifugal washing with ethanol.

### Supplementary Figures

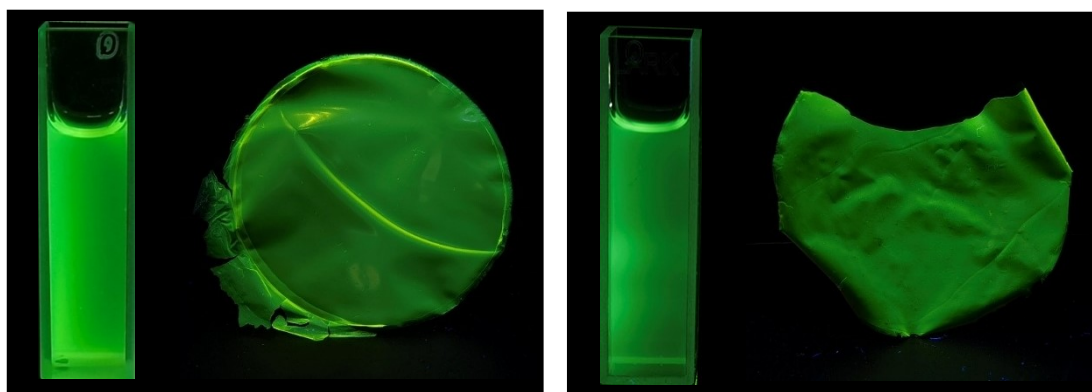

Strategy a: via modification first

Strategy b: via nanosizing first

Figure.S1 The left figure shows the dispersion and film of fluorescent chitin nanofibers prepared by modification first of strategy a. The right figure shows the dispersion and film of fluorescent chitin nanofibers prepared by nanosizing first of strategy b.

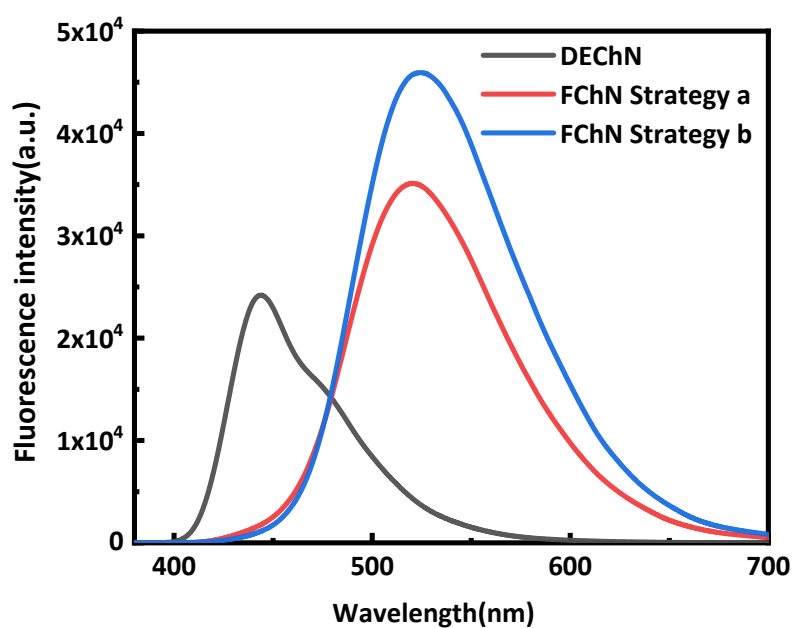

Figure.S2 Emission spectra of fluorescent chitin nanofibers prepared by two strategies.

Table S1 The amount of chemical reagents used and wasted in additional steps in traditional methods strategy b

| Procedure | Chemical reagent |                |                    | Waste salt       |
|-----------|------------------|----------------|--------------------|------------------|
|           | NaOH/g           | Acetic acid/mL | Distilled water/mL | Sodium acetate/g |
| b1        | 2.58             | -              | 640                | -                |
| b2        | -                | 5.00           | 500                | -                |
| b3        | 4.30             | -              | 200                | 7.20             |

NOTE: The amount of the chemical reagents is calculated based on 1.00 g chitin and the resulted FChN dispersion with a concentration of 0.20 wt%.

Table S2 Comparison of preparation processes of different fluorescent nanofibers.

| Entry | Sample name | Modification |          | Separation                                            |                | Ref.      |
|-------|-------------|--------------|----------|-------------------------------------------------------|----------------|-----------|
|       |             | temperature  | time     | steps                                                 | reagent        |           |
| 1     | dChNC-FITC  | RT           | 36 h     | centrifugation                                        | ethanol, water | 1         |
| 2     | FChN        | 120°C        | 4-48 h   | centrifugation, filtration                            | ethanol        | 2         |
| 3     | DTAF-CNF    | RT           | 24 h     | vacuum filtration, centrifugation and ultrafiltration | NaOH           | 3         |
| 4     | TOCNC-AANI  | RT           | 16 h     | centrifugation, dialysis                              | water          | 4         |
| 5     | CNC-RBITC   | 60°C         | 4 h+24 h | dialysis                                              | water          | 5         |
| 6     | FCNC        | RT           | 16 h     | centrifugation, dialysis                              | water          | 6         |
| 7     | FCNF        | 60°C         | 4 h+24 h | centrifugation, filtration                            | water          | 7         |
| 8     | DTAP-CNF    | RT           | 24 h     | centrifugation, dialysis                              | water, PBS     | 8         |
| 9     | FChN        | RT           | 4 h      | centrifugation                                        | ethanol        | This work |

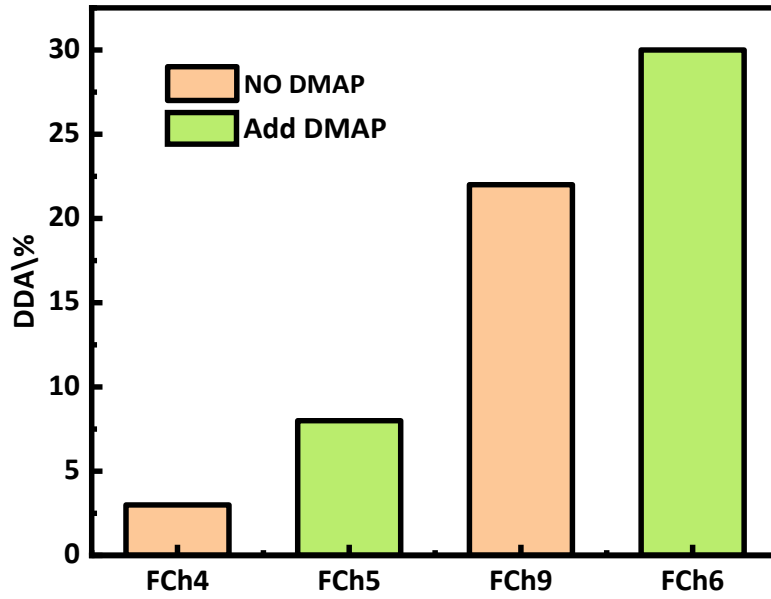

Figure S3 DDA of different FCh samples.

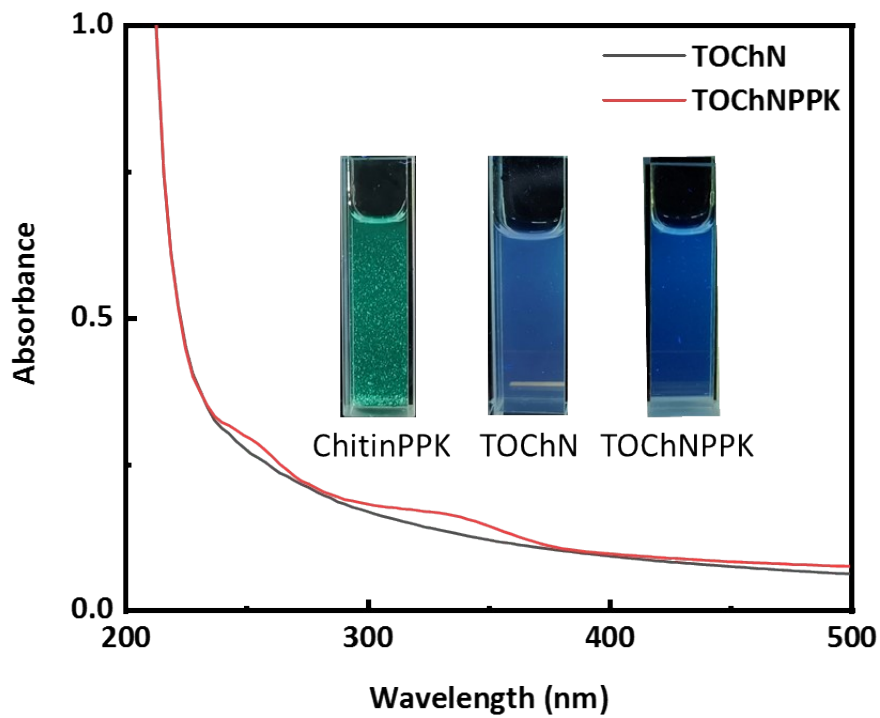

Figure S4 The absorbance of TOChN and TOChN-PPK and digital photographs of ChitinPPK, TOChN and TOChNPPK under UV (365 nm).

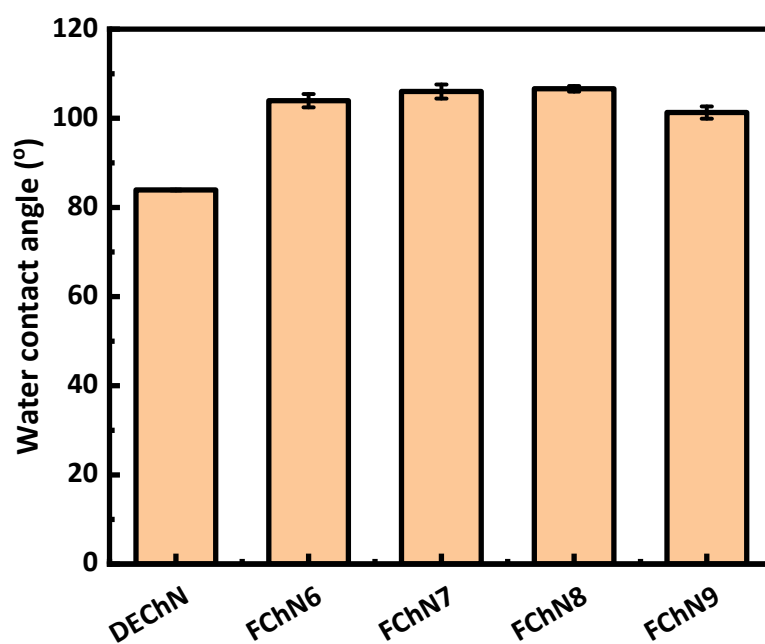

Figure.S5 Hydrophobicity of DEChN and FChN6-9.

Table S3 Summary of mechanical properties and UV shielding properties of different sustainable materials.

| Entry | Sample name   | Stress/<br>MPa | UV<br>shielding/% | UV<br>shielding<br>to/nm | Ref.      |
|-------|---------------|----------------|-------------------|--------------------------|-----------|
| 1     | ChNF/PVA      | 225.00         | 100.00            | 360                      | 9         |
| 2     | PVA-ChNF-LNPs | 33.24          | 100.00            | 350                      | 10        |
| 3     | GL            | 70.00          | 100.00            | 400                      | 11        |
| 4     | CMC/Pal-D1    | 40.02          | 97.00             | 300                      | 12        |
| 5     | CNF-VE        | 127.78         | 100.00            | 400                      | 13        |
| 6     | C/PVA/CIP     | 54.00          | 100.00            | 355                      | 14        |
| 7     | BACNC         | 11.55          | 97.00             | 300                      | 15        |
| 8     | CS:hBNNSs     | 35.90          | 96.40             | 400                      | 16        |
| 9     | HEC/ANFs      | 55.60          | 100.00            | 375                      | 17        |
| 10    | ACN           | 73.50          | 87.00             | 400                      | 18        |
| 11    | PI/PDA-120    | 94.10          | 100.00            | 400                      | 19        |
| 12    | FChN          | 200.12         | 100.00            | 400                      | This work |

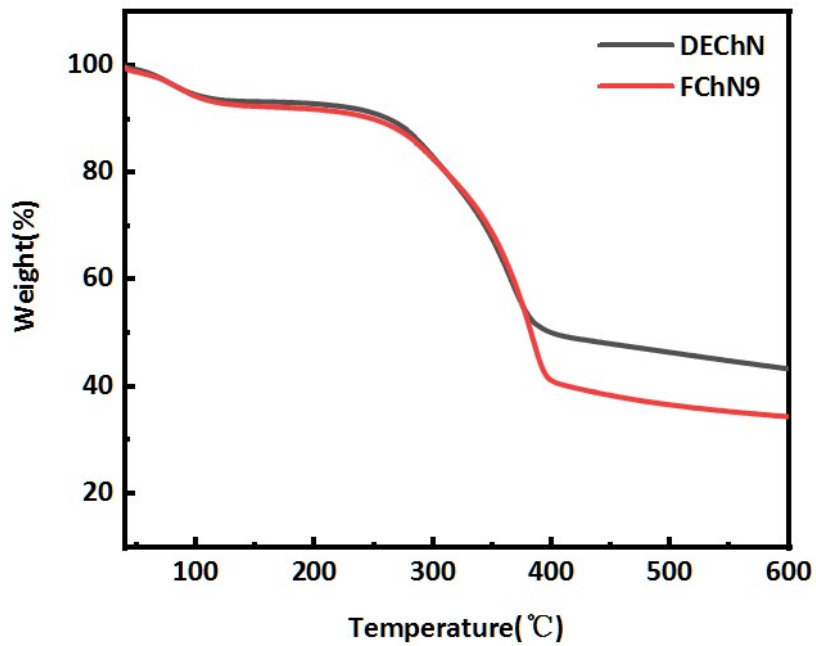

Figure S6 Thermal stability analysis of FChN9 and DEChN

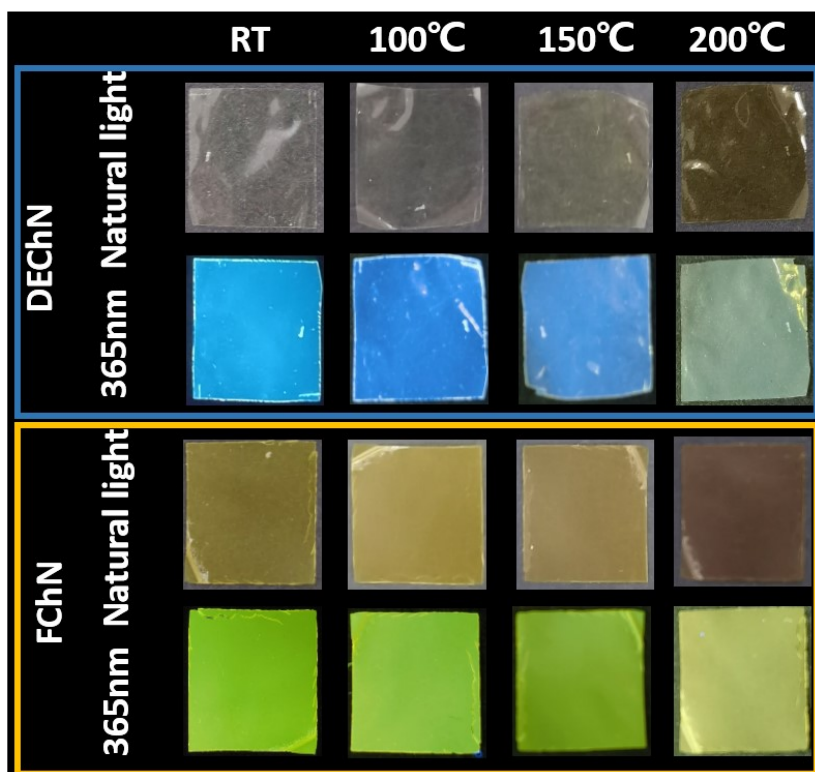

Figure S7 Stability of DEChN and FChN9 at different temperatures

## References

- 1 M. Zhou, Z. Liu, T. Liu, Y. Zhu and N. Lin, *ACS Sustain. Chem. Eng.*, 2022, **10**, 10327–10338.
- 2 A. K. Dutta, H. Izawa, M. Morimoto, H. Saimoto and S. Ifuku, *J. Chitin Chitosan Sci.*, 2015, **3**, 53–56.
- 3 M. S. Reid, M. Karlsson and T. Abitbol, *Carbohydr. Polym.*, 2020, **250**, 116943.
- 4 W. Wu, R. Song, Z. Xu, Y. Jing, H. Dai and G. Fang, *Sensors Actuators B Chem.*, 2018, **275**, 490–498.
- 5 K. A. Mahmoud, J. A. Mena, K. B. Male, S. Hrapovic, A. Kamen and J. H. T. Luong, *ACS Appl. Mater. Interfaces*, 2010, **2**, 2924–2932.
- 6 R. Song, Q. Zhang, Y. Chu, L. Zhang, H. Dai and W. Wu, *Cellulose*, 2019, **26**, 9553–9565.
- 7 Q. Ding, J. Zeng, B. Wang, W. Gao, K. Chen, Z. Yuan, J. Xu and D. Tang, *Carbohydr. Polym.*, 2018, **186**, 73–81.
- 8 M. Babi, A. Fatona, X. Li, C. Cerson, V. M. Jarvis, T. Abitbol and J. M. Moran-Mirabal, *Biomacromolecules*, 2022, **23**, 1981–1994
- 9 D. Jiao, Z. Li, J. Y. Hu, X. N. Zhang, J. Guo, Q. Zheng and Z. L. Wu, *Compos. Sci. Technol.*, 2023, **244**, 110295.
- 10 Q. Zhou, J. Chen, C. Wang, G. Yang, S. Janaswamy, F. Xu and Z. Liu, *Ind. Crops Prod.*, 2022, **188**, 115669.
- 11 M. J. Mehta and A. Kumar, *Chem. – A Eur. J.*, 2019, **25**, 1269–1274.
- 12 D. Huang, Y. Zheng and Q. Quan, *Appl. Clay Sci.*, 2019, **183**, 105314.
- 13 B. Kumar, S. Adil, D. H. Pham and J. Kim, *Heliyon*, 2024, **10**, e25272.
- 14 M. Ahmed, A. R. Bhat, A. K. Verma and R. Patel, *ACS Appl. Bio Mater.*, 2023, **6**, 663–673.
- 15 Y. Ren, J. Ma, W. Liu, C. Huang, C. Lai, Z. Ling and Q. Yong, *Int. J. Biol. Macromol.*, 2022, **204**, 41–49.
- 16 K. Wang, F. Li, X. Sun, F. Wang, D. Xie and Y. Wei, *Int. J. Biol. Macromol.*, 2023, **251**, 126308.
- 17 J. Huang, Z. Lu, J. Li, D. Ning, Z. Jin, Q. Ma, L. Hua, S. E and M. Zhang,

- Carbohydr. Polym.*, 2021, **255**, 117330.
- 18 M. M. Hasan, M. S. Hossain, M. D. Islam, M. M. Rahman, A. S. Ratna and S. Mukhopadhyay, *ACS Appl. Mater. Interfaces*, 2023, **15**, 32011-32023.
- 19 Q. Li, S. Liu, Y. Guo, Y. Liang, H. Peng, R. Chen, F. Lei, W. Wu, H. Zhao, Q. Zhang, R. K. Y. Li and W. Duan, *ACS Appl. Polym. Mater.*, 2021, **3**, 896-907.
